# Supplementary material for: Synthesis and characterization of MoSe2 nanoscrolls via pulsed laser ablation in deep eutectic solvents
Source: Royal Society of Chemistry journal article supplement (doi:10.1039/d4nr01466a), 2024-01-01
Supplement: d4nr01466a1.pdf [file d4nr01466a1.pdf]

## Synthesis and Characterization of MoSe<sub>2</sub> Nanoscrolls via Pulsed Laser Ablation in Deep Eutectic Solvents. Supplemental Information.

Figure S-1. Size distribution of MoSe<sub>2</sub>

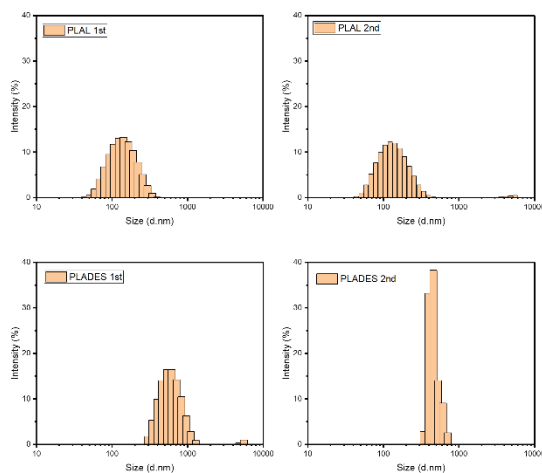

Figure S 1. Size distribution of MoSe<sub>2</sub> in DI water (PLAL) and reline (PLADES)

Size distribution of MoSe<sub>2</sub> shows preference for larger sizes in material ablated in deep eutectic solvent, and also show decreasing size with secondary irradiation. The PLAL samples passes from mono to bimodal distribution. In contrast PLADES synthesized sample passes from bimodal to mono disperse distribution.

Figure S-2. <sup>1</sup>HNMR of MoSe<sub>2</sub> produced in reline

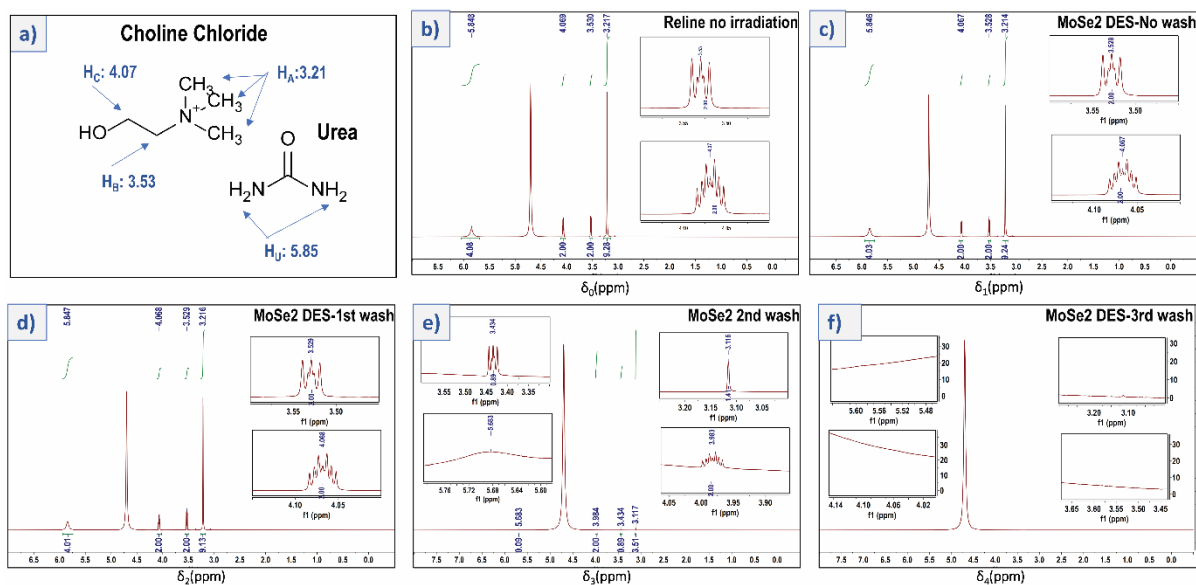

Figure S 2. <sup>1</sup>HNMR results of the serial waching steps suggesting no change in solvent composition by laser irradiation.

The experimental chemical shift of reline was measured before near infrared (NIR) irradiation figure S-2.a. No change in resonance frequency of reline was identified. The chemical shift of Reline after irradiation of MoSe<sub>2</sub> target (figure S-2.c), and after 1<sup>st</sup>, (figure S-2.d), 2<sup>nd</sup> (figure S-2.e) and 3<sup>rd</sup> (figure S-2.f) washing steps, were compared to the untreated neat reline (figure S-2.b). Chemical shift of Reline before and after irradiation conserve the same values and relative abundance, suggesting that there is no formation of secondary species due to solvent degradation by the interaction of 1064 nm pulsed laser.

Table TS-1. <sup>1</sup>HNMR of MoSe<sub>2</sub> produced in reline

| Label          | Treatment                           | Washed | H <sub>A</sub> | H <sub>B</sub> | H <sub>C</sub> | H <sub>U</sub> |
|----------------|-------------------------------------|--------|----------------|----------------|----------------|----------------|
| δ <sub>0</sub> | Neat reline, no irradiation         | No     | 3.22           | 3.53           | 4.07           | 5.85           |
| δ <sub>1</sub> | Reline +MoSe <sub>2</sub> NIR laser | No     | 3.21           | 3.53           | 4.07           | 5.85           |
| δ <sub>2</sub> | Reline +MoSe <sub>2</sub> NIR laser | 1X     | 3.22           | 3.53           | 4.07           | 5.85           |
| δ <sub>3</sub> | Reline +MoSe <sub>2</sub> NIR laser | 2X     | 3.12           | 3.43           | 3.98           | 5.68           |
| δ <sub>4</sub> | Reline +MoSe <sub>2</sub> NIR laser | 3X     | --             | --             | --             | --             |

Table TS 1. Chemical shift of deep eutectic solvent before and after ablation, and after removing reline

The chemical shift remains in the same range as neat reline. Shift upfield after second washing step suggest formation of hydrogen bonding with water of the remaining DES molecules, thus increasing the proton shielding.

Figure S-3. X-ray photoelectron spectrum after edging

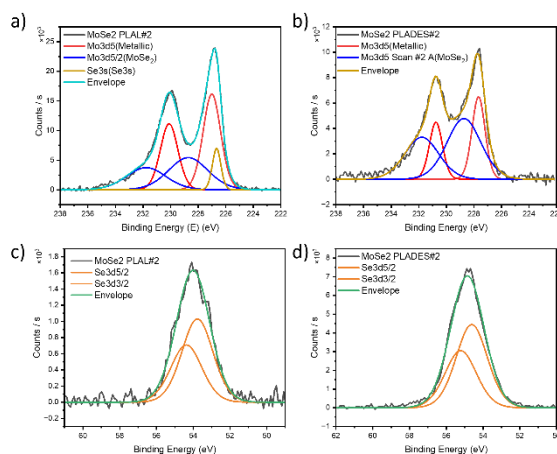

Figure S 3. X-ray photoelectron spectra of MoSe<sub>2</sub> after edging

After 20 seconds of edging, within the Mo3d region, PLAL synthesized MoSe<sub>2</sub> structures show presence of Mo<sup>+6</sup> (metallic Mo) at 227.1 eV in large quantities and small amount of MoSe<sub>2</sub> peaking at 228.7 eV (figure S-3.a). In contrast PLADES sample has large peaks of MoSe<sub>2</sub> at 228.8eV in comparison to the metallic Mo<sup>+6</sup> at 227.7 eV (figure S-2.b). Se3d region of PLAL treatment shows a 5/2 spin orbit split at 53.81 eV (figure S-2.c), while PLADES same feature peaks at 54.65 eV (figure S-2.d). These results suggest lower oxidation during synthesis in deep eutectic solvent, beyond the exposed surface.

## Figure S-4. MoSe<sub>2</sub> monolayer Se-Se distances

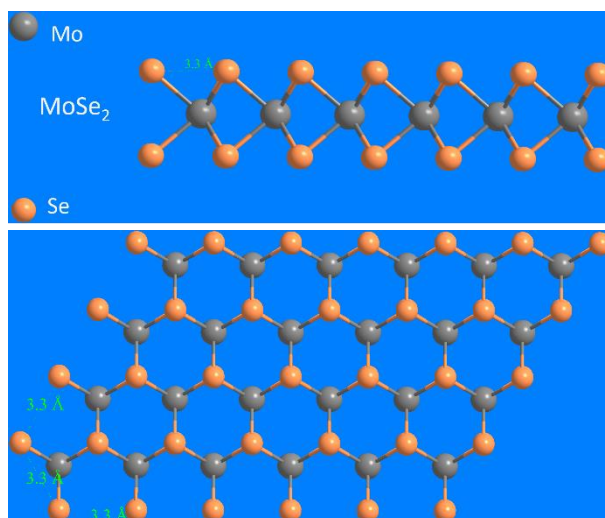

Figure S 4. MoSe<sub>2</sub> monolayer with a interplanar Se-Se distance of 3.3 Å

Representation of the rhombohedral MoSe<sub>2</sub> monolayer obtained by pulsed laser ablation in deep eutectic solvent corresponding to TEM and DP analysis, displaying distances between adjacent selenium atoms in the same layer (created using Vesta and ChemDraw 3D).

## Figure S-4. Measured Se-Se distances of MoSe<sub>2</sub> layer synthesized by PLADES

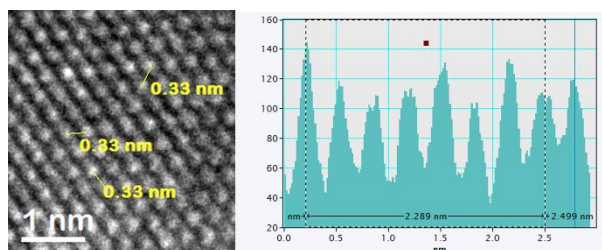

Figure S 5. MoSe<sub>2</sub> nanosheets with inter atomic distances of Se-Se 3.3 Å, analyzed by FFT and line profile.

HR-TEM micrographs of MoSe<sub>2</sub> nanosheets were analysed with line profile at atomic resolution, where recorded distances in between Se-Se atoms on the surface layer is 3.3 in all three directions corresponding to the 1T crystal structure.
